# Supplementary material
Source: Royal Society of Chemistry journal article supplement (doi:10.1039/d6fb00006a)
Supplement: d6fb00006a1.pdf [file d6fb00006a1.pdf]

## **Supplementary Tables and Figures**

### **Financial Analysis of Shipping Container-Based Mushroom Cultivation**

Mahsa Alian<sup>a</sup>, Sunil P. Dhoubhadel<sup>b</sup>, Sandesh Risal<sup>c</sup>, Pratikshya Tiwari<sup>c</sup>, Weihang Zhu<sup>c</sup>, and Venkatesh Balan<sup>a,c\*</sup>

*<sup>a</sup>Department of Civil and Environmental Engineering, Cullen College of Engineering, University of Houston, Houston, TX 77002*

*<sup>b</sup>Department of Agriculture, Nutrition and Human Ecology, College of Food, Agriculture, and Natural Resources, Prairie View A&M University, Prairie View, TX 77446*

*<sup>c</sup>Department of Engineering Technology, Cullen College of Engineering, University of Houston, Sugarland, TX 77479.*

\*Corresponding author V. Balan ([vbalan@uh.edu](mailto:vbalan@uh.edu))

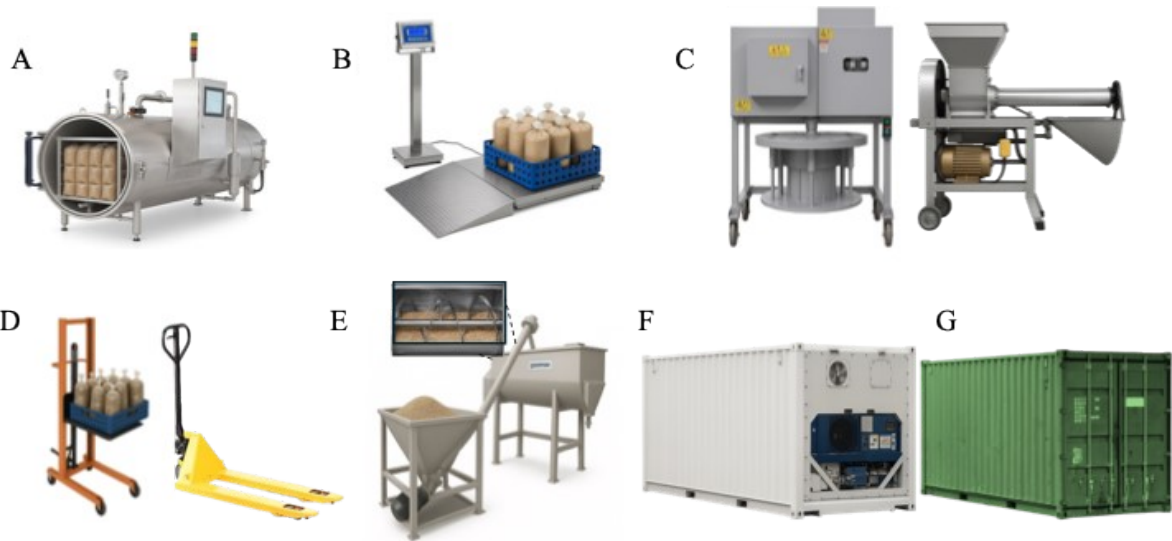

**Figure S1.** An overview of key machinery used in mushroom production. Here, A) sterilizers; B) weighing scales; C) substrate bottling or bagging machines; D) pallet jacks and tray lifting jacks; E) substrate hoppers and paddle mixers; F) refrigerated shipping containers; and G) non-insulated shipping containers.

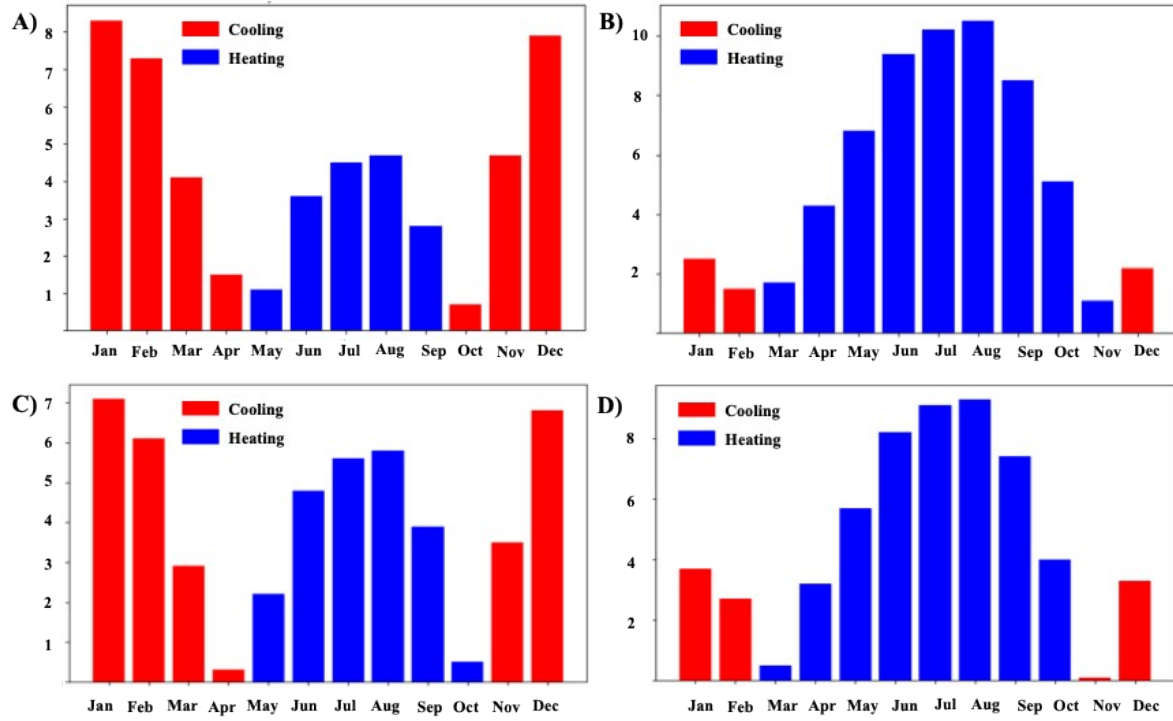

**Fig S2.** Monthly cooling and heating ventilation energy ( $E_{vent}$ ) for each mushroom species across the year, based on Houston ambient temperatures. Here, A) Oyster, B) Maitake, C) Lion's Mane, and D) Enoki.

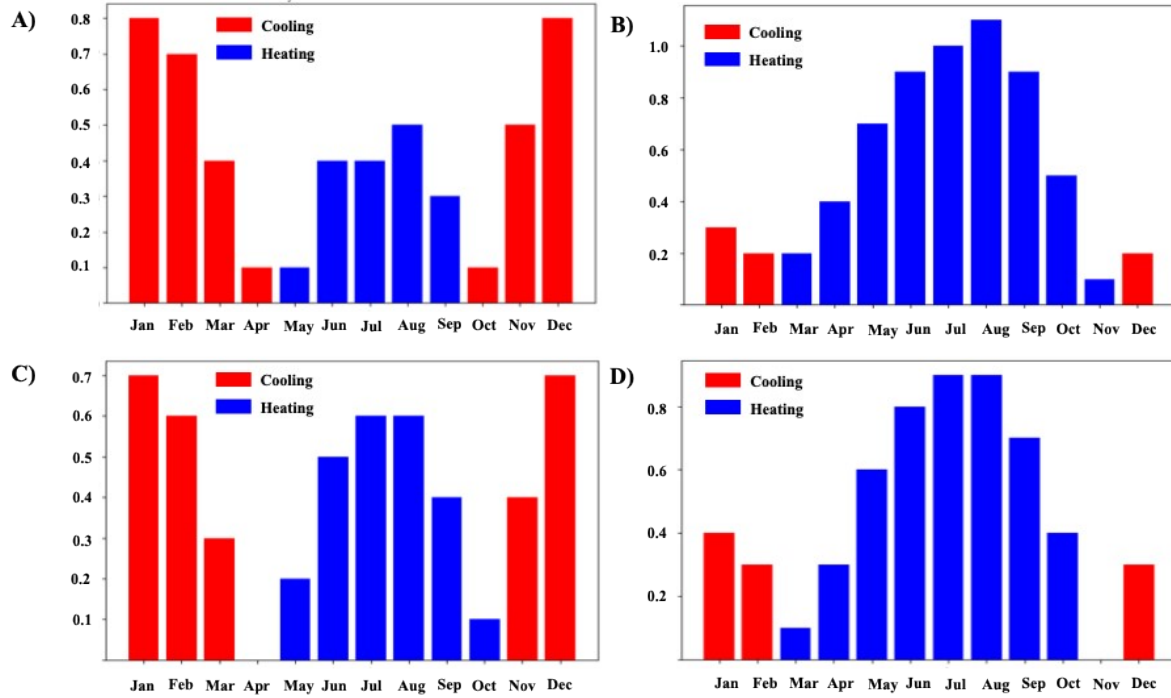

**Fig S3.** Seasonal transmission energy ( $E_{trans}$ ) requirements for Oyster, Maitake, Lion's Mane, and Enoki mushrooms. Positive bars indicate cooling-related conductive heat gain, while negative bars indicate heat loss requiring heating. Here, A) Oyster, B) Maitake, C) Lion's Mane, and D) Enoki.

**Table S1** Comparison of yield and cultivation metrics between bottle and bag substrates, showing differences in cycle time, substrate volume, density, and 90-day productivity.

| Parameters                                                     | Bottle<br>(Enoki, Morel)                                                          | Bag<br>(Maitake, Oyster)                                                            |
|----------------------------------------------------------------|-----------------------------------------------------------------------------------|-------------------------------------------------------------------------------------|
|                                                                |  |  |
| Number of flushes                                              | 1                                                                                 | 3                                                                                   |
| Dimensions of trays and bags (W x L x H and D x H) (in inches) | W = 12"<br>L = 16"<br>H = 10"                                                     | D= 18"<br>H= 33.8"                                                                  |
| No. of trays and bags in a 40-ft shipping container            | 228 Trays<br>2736 Bottles                                                         | 88                                                                                  |
| Amount of mushroom produced in a 40-ft growth chamber          | Enoki = 1880 lb<br>Morel = 1000 lb                                                | Oyster = 1560 lb<br>Maitake = 540 lb                                                |

**Table S2** Summary of equipment, container, and land requirements across production scales. The quantities of equipment, number of containers, and land area needed to support mushroom cultivation at different levels of production are provided.

| <b>Equipment</b>                   | <b>Mushroom farm's production capacity</b> |                   |                   |                   |
|------------------------------------|--------------------------------------------|-------------------|-------------------|-------------------|
|                                    | <b>50 lb/day</b>                           | <b>100 lb/day</b> | <b>200 lb/day</b> | <b>500 lb/day</b> |
| Autoclave                          | 1                                          | 2                 | 3                 | 3                 |
| Industrial balance                 | 1                                          | 1                 | 2                 | 3                 |
| Filling machine                    | 1                                          | 2                 | 3                 | 3                 |
| Ribbon mixer                       | 1                                          | 2                 | 3                 | 3                 |
| Industrial stacker                 | 1                                          | 1                 | 2                 | 2                 |
| Refrigerated container             | 2                                          | 4                 | 10                | 21                |
| Regular container                  | 5                                          | 7                 | 7.5               | 12                |
| Containers area (ft <sup>2</sup> ) | 5,000                                      | 10,000            | 15,000            | 25,000            |

**Table S3** Capital and variable cost assumptions.

| <b>Cost</b>                      | <b>Min<br/>(USD/Unit)</b> | <b>Max<br/>(USD/Unit)</b> | <b>Average<br/>(USD/Unit)</b> |
|----------------------------------|---------------------------|---------------------------|-------------------------------|
| <i>Capital Cost</i>              |                           |                           |                               |
| Autoclave                        | 40,000                    | 80,000                    | 60,000                        |
| Industrial balance               | 1,600                     | 1,800                     | 1,700                         |
| Filling machine                  | 2,000                     | 4,000                     | 3,000                         |
| Ribbon mixer                     | 15,000                    | 20,000                    | 17,500                        |
| Industrial stacker               | 5,000                     | 10,000                    | 7,500                         |
| Others (Office and lab supplies) | 16,440                    | 48,720                    | 32,580                        |
| <i>Per Unit Variable Cost</i>    |                           |                           |                               |
| Water (gal)                      | 0.002                     | 0.003                     | 0.0025                        |
| Pelleted substrate (lb)          | 0.08                      | 0.10                      | 0.09                          |
| Spawn (lb)                       | 0.75                      | 0.10                      | 0.40                          |
| Electricity (kWh)                | 0.07                      | 0.08                      | 0.075                         |
| Human labor (hour)               | 7.00                      | 8.00                      | 7.50                          |

**Table S4** Daily electricity consumption by production scale. Total power usage (kWh/day) across all containers, including substrate preparation, cultivation, and access areas, as well as associated equipment, for each level of mushroom production.

| <b>Electricity equipment usage (kwh)</b>   |                  |                   |                   |                   |
|--------------------------------------------|------------------|-------------------|-------------------|-------------------|
| <b>Production Scale</b>                    | <b>50 lb/day</b> | <b>100 lb/day</b> | <b>200 lb/day</b> | <b>500 lb/day</b> |
| Ventilation system                         | 93.2             | 146.5             | 233.1             | 439.6             |
| Heating/Cooling System (HVAC)              | 193.2            | 303.6             | 483.0             | 910.8             |
| Humidification System                      | 8.6              | 17.3              | 43.2              | 90.7              |
| Lighting                                   | 8.6              | 17.3              | 43.2              | 90.7              |
| Water Pump & Irrigation                    | 0.4              | 0.8               | 2.1               | 4.4               |
| Monitoring & Control Systems               | 1.7              | 3.4               | 8.4               | 17.6              |
| Autoclave                                  | 21.0             | 42.0              | 63.0              | 63.0              |
| Industrial balance                         | 0.6              | 0.6               | 1.2               | 1.8               |
| Filling machine                            | 1.5              | 3.0               | 9.0               | 9.0               |
| Industrial Stacker                         | 2.3              | 2.3               | 4.6               | 4.6               |
| Ribbon Mixer                               | 8.0              | 16.0              | 24.0              | 24.0              |
| <b>Total</b>                               | <b>339.2</b>     | <b>552.8</b>      | <b>914.8</b>      | <b>1656.3</b>     |
| <b>Internal Electrical Heat Gain (kWh)</b> |                  |                   |                   |                   |
| Ventilation system                         | 28.0             | 44.0              | 69.9              | 131.9             |
| Humidification System                      | 2.6              | 5.2               | 13.0              | 27.2              |
| Lighting (Supplementary)                   | 2.6              | 5.2               | 13.0              | 27.2              |
| Water Pump & Irrigation                    | 0.1              | 0.3               | 0.6               | 1.3               |
| Monitoring & Control Systems               | 0.5              | 1.0               | 2.5               | 5.3               |
| Autoclave                                  | 6.3              | 12.6              | 18.9              | 18.9              |
| Industrial balance                         | 0.2              | 0.2               | 0.4               | 0.5               |
| Filling machine                            | 0.5              | 0.9               | 2.7               | 2.7               |
| Industrial Stacker                         | 0.7              | 0.7               | 1.4               | 1.4               |
| Ribbon Mixer                               | 2.4              | 4.8               | 7.2               | 7.2               |
| <b>Total</b>                               | <b>43.8</b>      | <b>74.8</b>       | <b>129.5</b>      | <b>223.6</b>      |
| <b>Ventilation Heat Load</b>               |                  |                   |                   |                   |
| Oyster                                     | 13.4             | 21.1              | 33.6              | 63.4              |
| Maitake                                    | 53.8             | 84.5              | 134.5             | 253.6             |
| Lion's Mane                                | 21.5             | 33.8              | 53.8              | 101.4             |
| Enoki                                      | 45.7             | 71.9              | 114.3             | 215.6             |
| <b>Transmission Thermal Heat (kWh)</b>     |                  |                   |                   |                   |
| Oyster                                     | 1.4              | 2.1               | 3.4               | 6.4               |

|                                      |       |       |        |        |
|--------------------------------------|-------|-------|--------|--------|
| Maitake                              | 5.4   | 8.5   | 13.5   | 25.5   |
| Lion's Mane                          | 2.2   | 3.4   | 5.4    | 10.2   |
| Enoki                                | 4.6   | 7.2   | 11.5   | 21.7   |
| <b>Biological Product Heat (kWh)</b> |       |       |        |        |
| All Mushrooms                        | 5.4   | 10.8  | 21.7   | 54.2   |
| <b>Total kWh</b>                     |       |       |        |        |
| Oyster                               | 403.2 | 661.6 | 1103.0 | 2003.9 |
| Maitake                              | 447.6 | 731.4 | 1214.0 | 2213.2 |
| Lion's Mane                          | 412.1 | 675.6 | 1125.2 | 2045.7 |
| Enoki                                | 438.8 | 717.5 | 1191.8 | 2171.3 |

**Table S5** Financial performance of Oyster mushroom produced at four scales. This table presents 10-year projections for daily production outputs of 50, 100, 200, and 500 lb, detailing revenue and Net Cash Flow for 10 years.

| Years | Revenue   |            |            |             | Discounted Net Cash Flow |            |            |            |
|-------|-----------|------------|------------|-------------|--------------------------|------------|------------|------------|
|       | 50 lb/day | 100 lb/day | 200 lb/day | 500 lb/day  | 50 lb/day                | 100 lb/day | 200 lb/day | 500 lb/day |
| 1     | \$105,080 | \$210,160  | \$420,319  | \$1,050,798 | -\$17,138                | \$16,465   | \$71,850   | \$384,901  |
| 2     | \$115,974 | \$231,949  | \$463,898  | \$1,155,000 | -\$8,971                 | \$850      | \$89,594   | \$418,645  |
| 3     | \$118,874 | \$237,747  | \$475,495  | \$1,183,875 | -\$8,418                 | \$432      | \$86,251   | \$403,005  |
| 4     | \$121,846 | \$243,691  | \$487,382  | \$1,213,472 | -\$7,902                 | \$59       | \$83,026   | \$387,940  |
| 5     | \$124,892 | \$249,783  | \$499,567  | \$1,243,809 | -\$7,420                 | \$274      | \$79,917   | \$373,431  |
| 6     | \$128,014 | \$256,028  | \$512,056  | \$1,274,904 | -\$6,971                 | \$569      | \$76,918   | \$359,458  |
| 7     | \$131,214 | \$262,429  | \$524,857  | \$1,306,776 | -\$6,551                 | \$830      | \$74,027   | \$346,000  |
| 8     | \$134,495 | \$268,989  | \$537,979  | \$1,339,446 | -\$6,159                 | \$1,059    | \$71,240   | \$333,040  |
| 9     | \$137,857 | \$275,714  | \$551,428  | \$1,372,932 | -\$5,794                 | \$1,260    | \$68,554   | \$320,559  |
| 10    | \$141,304 | \$282,607  | \$565,214  | \$1,407,255 | -\$5,452                 | \$1,434    | \$65,965   | \$308,540  |

**Table S6** Financial performance of Lion’s Mane mushrooms produced at four scales. This table presents 10-year projections for daily production outputs of 50, 100, 200, and 500 lb, detailing revenue and Net Cash Flow for 10 years.

| Years | Revenue   |            |             |             | Discounted Net Cash Flow |            |            |            |
|-------|-----------|------------|-------------|-------------|--------------------------|------------|------------|------------|
|       | 50 lb/day | 100 lb/day | 200 lb/day  | 500 lb/day  | 50 lb/day                | 100 lb/day | 200 lb/day | 500 lb/day |
| 1     | \$186,809 | \$373,618  | \$747,235   | \$1,868,088 | \$240,907                | \$36,977   | \$85,022   | \$807,759  |
| 2     | \$225,675 | \$451,350  | \$902,700   | \$2,256,750 | \$316,364                | \$56,711   | \$124,077  | \$988,708  |
| 3     | \$231,317 | \$462,634  | \$925,268   | \$2,313,169 | \$304,545                | \$54,594   | \$119,442  | \$951,759  |
| 4     | \$237,100 | \$474,200  | \$948,399   | \$2,370,998 | \$293,161                | \$52,553   | \$114,977  | \$916,184  |
| 5     | \$243,027 | \$486,055  | \$972,109   | \$2,430,273 | \$282,197                | \$50,586   | \$110,676  | \$881,930  |
| 6     | \$249,103 | \$498,206  | \$996,412   | \$2,491,030 | \$271,637                | \$48,691   | \$106,532  | \$848,950  |
| 7     | \$255,331 | \$510,661  | \$1,021,322 | \$2,553,305 | \$261,468                | \$46,866   | \$102,540  | \$817,196  |
| 8     | \$261,714 | \$523,428  | \$1,046,855 | \$2,617,138 | \$251,675                | \$45,107   | \$98,695   | \$786,623  |
| 9     | \$268,257 | \$536,513  | \$1,073,027 | \$2,682,567 | \$242,245                | \$43,413   | \$94,991   | \$757,189  |
| 10    | \$274,963 | \$549,926  | \$1,099,852 | \$2,749,631 | \$233,163                | \$41,781   | \$91,424   | \$728,849  |

**Table S7** Financial performance of Maitake mushrooms produced at four scales. This table presents 10-year projections for daily production outputs of 50, 100, 200, and 500 lb, detailing revenue and Net Cash Flow for 10 years.

| Years | Revenue   |            |            |             | Discounted Net Cash Flow |            |            |            |
|-------|-----------|------------|------------|-------------|--------------------------|------------|------------|------------|
|       | 50 lb/day | 100 lb/day | 200 lb/day | 500 lb/day  | 50 lb/day                | 100 lb/day | 200 lb/day | 500 lb/day |
| 1     | \$149,466 | \$298,931  | \$597,862  | \$1,494,656 | \$9,881                  | \$38,604   | \$149,670  | \$580,534  |
| 2     | \$180,562 | \$361,125  | \$722,250  | \$1,805,625 | \$30,117                 | \$71,444   | \$211,656  | \$727,772  |
| 3     | \$185,077 | \$370,153  | \$740,306  | \$1,850,766 | \$28,993                 | \$68,777   | \$203,750  | \$700,577  |
| 4     | \$189,703 | \$379,407  | \$758,814  | \$1,897,035 | \$27,909                 | \$66,206   | \$196,134  | \$674,390  |
| 5     | \$194,446 | \$388,892  | \$777,784  | \$1,944,461 | \$26,864                 | \$63,728   | \$188,796  | \$649,174  |
| 6     | \$199,307 | \$398,614  | \$797,229  | \$1,993,072 | \$25,856                 | \$61,339   | \$181,728  | \$624,894  |
| 7     | \$204,290 | \$408,580  | \$817,160  | \$2,042,899 | \$24,884                 | \$59,036   | \$174,920  | \$601,515  |
| 8     | \$209,397 | \$418,794  | \$837,589  | \$2,093,971 | \$23,947                 | \$56,817   | \$168,362  | \$579,004  |
| 9     | \$214,632 | \$429,264  | \$858,528  | \$2,146,321 | \$23,043                 | \$54,678   | \$162,045  | \$557,329  |
| 10    | \$219,998 | \$439,996  | \$879,991  | \$2,199,979 | \$22,173                 | \$52,618   | \$155,962  | \$536,461  |

**Table S8** Financial performance of Enoki mushrooms produced at four scales. This table presents 10-year projections for daily production outputs of 50, 100, 200, and 500 lb, detailing revenue and Net Cash Flow for 10 years.

| Years | Revenue   |            |            |             | Discounted Net Cash Flow |            |            |            |
|-------|-----------|------------|------------|-------------|--------------------------|------------|------------|------------|
|       | 50 lb/day | 100 lb/day | 200 lb/day | 500 lb/day  | 50 lb/day                | 100 lb/day | 200 lb/day | 500 lb/day |
| 1     | \$149,840 | \$299,680  | \$599,359  | \$1,498,398 | \$23,624                 | \$58,751   | \$188,798  | \$678,136  |
| 2     | \$165,375 | \$330,750  | \$661,500  | \$1,653,750 | \$30,029                 | \$71,129   | \$210,887  | \$725,640  |
| 3     | \$169,509 | \$339,019  | \$678,038  | \$1,695,094 | \$28,909                 | \$68,474   | \$203,010  | \$698,524  |
| 4     | \$173,747 | \$347,494  | \$694,988  | \$1,737,471 | \$27,828                 | \$65,914   | \$195,421  | \$672,414  |
| 5     | \$178,091 | \$356,182  | \$712,363  | \$1,780,908 | \$26,785                 | \$63,447   | \$188,110  | \$647,272  |
| 6     | \$182,543 | \$365,086  | \$730,172  | \$1,825,431 | \$25,780                 | \$61,068   | \$181,068  | \$623,063  |
| 7     | \$187,107 | \$374,213  | \$748,427  | \$1,871,066 | \$24,811                 | \$58,776   | \$174,284  | \$599,752  |
| 8     | \$191,784 | \$383,569  | \$767,137  | \$1,917,843 | \$23,877                 | \$56,566   | \$167,750  | \$577,307  |
| 9     | \$196,579 | \$393,158  | \$786,316  | \$1,965,789 | \$22,976                 | \$54,437   | \$161,456  | \$555,696  |
| 10    | \$149,840 | \$299,680  | \$599,359  | \$1,498,398 | \$22,108                 | \$52,386   | \$155,394  | \$534,888  |
